# Supplementary material
Source: PubMed Central journal article supplement (PMC3682138)
Supplement: npp201341x1.pdf [file npp201341x1.pdf]

**Supplemental Table 1: Medication class usage by subject group. Medications used in the Psychiatric class were sedative/hypnotic agents (i.e. trazodone and zolpidem).**

| Study Group        | (1) Allergy/Cold/ENT # | (2) Analgesics # | (3) Antimicrobials # | (4) Asthma/Pulmonary # | (5) Cardiovascular # | (6) Dental/Oral Care # | (7) Dermatologic # | (8) Emergency # | (9) Endocrine/Metabolism # | (10) Gastrointestinal # | (11) Genitourinary # | (12) Hematology/Oncology # | (13) Immunization # | (14) Immunologics # | (15) Neurologic # | (16) Nutrition/Electrolytes # | (17) Obstetrics/Gynecology # | (18) Ophthalmic # | (19) Other # | (20) Psychiatric # | (21) Rheumatologic # |
|--------------------|------------------------|------------------|----------------------|------------------------|----------------------|------------------------|--------------------|-----------------|----------------------------|-------------------------|----------------------|----------------------------|---------------------|---------------------|-------------------|-------------------------------|------------------------------|-------------------|--------------|--------------------|----------------------|
| HC                 | 1                      | 5                | 1                    | 2                      | 12                   | 0                      | 1                  | 0               | 3                          | 3                       | 6                    | 1                          | 0                   | 1                   | 0                 | 15                            | 0                            | 3                 | 1            | 0                  | 0                    |
| MD                 | 3                      | 5                | 2                    | 0                      | 8                    | 0                      | 0                  | 0               | 2                          | 2                       | 3                    | 0                          | 0                   | 0                   | 3                 | 13                            | 0                            | 0                 | 0            | 1                  | 0                    |
| DC                 | 1                      | 3                | 1                    | 2                      | 20                   | 0                      | 0                  | 0               | 19                         | 3                       | 3                    | 2                          | 0                   | 0                   | 3                 | 10                            | 0                            | 2                 | 0            | 1                  | 0                    |
| DD                 | 4                      | 5                | 0                    | 2                      | 19                   | 0                      | 0                  | 0               | 18                         | 4                       | 3                    | 0                          | 0                   | 0                   | 7                 | 0                             | 2                            | 0                 | 1            | 0                  | 0                    |
| <b>Grand Total</b> | <b>9</b>               | <b>18</b>        | <b>4</b>             | <b>6</b>               | <b>59</b>            | <b>0</b>               | <b>1</b>           | <b>0</b>        | <b>42</b>                  | <b>12</b>               | <b>15</b>            | <b>3</b>                   | <b>0</b>            | <b>1</b>            | <b>6</b>          | <b>45</b>                     | <b>0</b>                     | <b>7</b>          | <b>1</b>     | <b>3</b>           | <b>0</b>             |
